# Supplementary material for: Preconditioning in the reef-building coralPocillopora damicornisand the potential for trans-generational acclimatization in coral larvae under future climate change conditions
Source: Oxford University Press journal article supplement (doi:10.1242/jeb.123018), 2015-08-01
Supplement: jeb123018supp.pdf [file jeb123018supp.pdf]

**Preconditioning in the reef-building coral *Pocillopora damicornis* and the potential for trans-generational acclimatization in coral larvae under future climate change conditions**

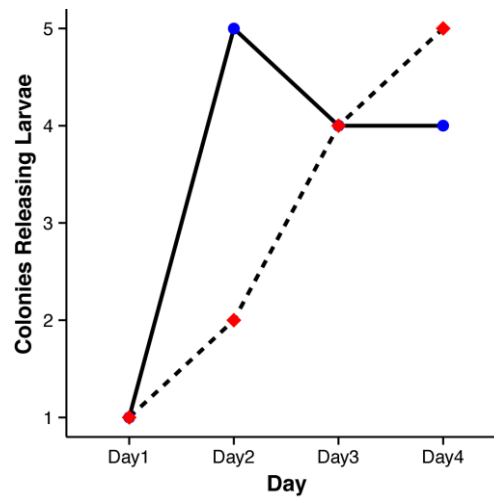

**Figure S1.** Number of colonies releasing larvae on each of four days near the peak of larval release in September 2011. The ambient treatment is shown in blue and high treatment in red.

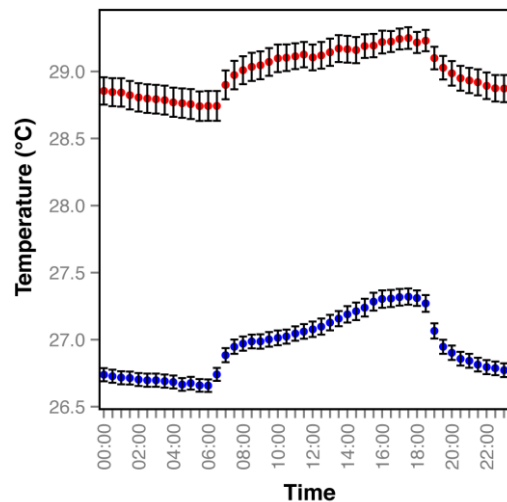

**Figure S2.** Mean daily temperature in the experimental tanks (Hobo loggers, measurement frequency of 30min) averaged over the course of the experiment by treatment (mean  $\pm$  sem,  $n=2093$  per treatment, August 4 - September 16). The ambient treatment is shown in blue and high treatment in red.
